# Supplementary material for: Comparison of qPCR with ddPCR for the Quantification of JC Polyomavirus in CSF from Patients with Progressive Multifocal Leukoencephalopathy
Source: MDPI journal article supplement (doi:10.3390/v14061246), 2022-06-08
Supplement: s1 [file s1]

## Supplementary Materials

**Supplementary Table S1.** Demographic and clinical characteristics of 12 non-PML patients.

| Patient    | Sex/Race                  | Age | Diagnosis                             |
|------------|---------------------------|-----|---------------------------------------|
| Patient 1  | M/Unknown                 | 21  | Optic neuritis, vertigo               |
| Patient 2  | M/Multiple Race           | 27  | CSF Lymphoma, EBV positive            |
| Patient 3  | F/WC                      | 49  | Cryptococcal meningitis               |
| Patient 4  | M/WC                      | 53  | Sarcoma                               |
| Patient 5  | F/WC                      | 47  | No known neurologic disease           |
| Patient 6  | M/WC                      | 7   | Neurologic deficiency, non-infectious |
| Patient 7  | F/WC                      | 53  | Toxoplasmosis                         |
| Patient 8  | M/WC                      | 69  | CNS Lymphoma EBV positive             |
| Patient 9  | F/WC                      | 22  | Neurologic deficiency, non-infectious |
| Patient 10 | M/Hawaiian/Pacific Island | 17  | Glioblastoma                          |
| Patient 11 | F/Unknown                 | 52  | RRMS                                  |
| Patient 12 | F/WC                      | 72  | MS Spectrum                           |

M = Male; F = Female; WC = White/Caucasian; CSF = Cerebrospinal Fluid; EBV = Epstein-Barr Virus; CNS = Central Nervous System; RRMS = Relapsing-Remitting Multiple Sclerosis; MS = Multiple Sclerosis

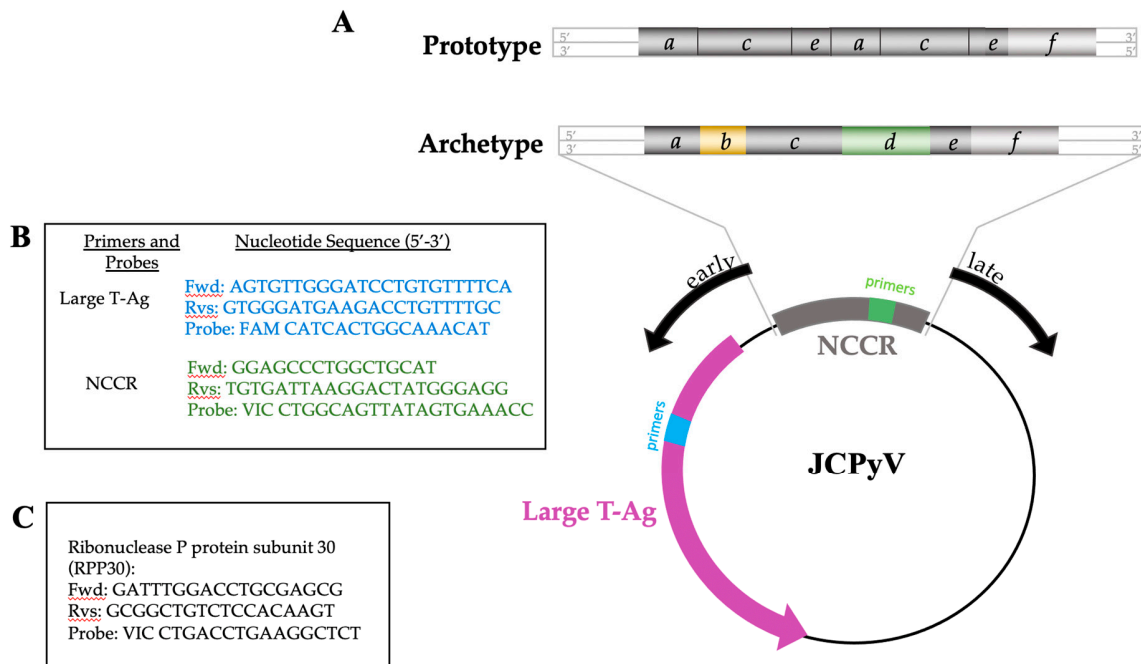

**Supplementary Figure S1.** Schematic comparison between JCPyV prototype and archetype genomes. The blue and green squares in the JCPyV schema identify the location of the primers/probe sets respectively in the Large T-Ag region and in the NCCR. The full sequence of the primers/probe sets is reported in the inset (B). The sequence of the primers and probe for the reference gene, RPP30, is reported in the inset (C).

**Supplementary Table S2.** Direct comparison of numbers of qPCR detectability versus ddPCR detectability. Out of 54 ddPCR samples with detectable JCPyV levels, 5 were undetectable on qPCR.

|                          | <b>Detectable ddPCR</b> | <b>Undetectable ddPCR</b> |    |
|--------------------------|-------------------------|---------------------------|----|
| <b>Detectable qPCR</b>   | 49                      | 0                         | 49 |
| <b>Undetectable qPCR</b> | 5                       | 8                         | 13 |
|                          | 54                      | 8                         | 62 |

**Supplementary Table S3.** Comparison of large T-Ag coding sequence copy numbers identified by qPCR and ddPCR

| <b>Patient (date)</b> | <b>ddPCR<br/>copies/mL</b> | <b>qPCR<br/>copies/mL</b> |
|-----------------------|----------------------------|---------------------------|
| 1 (08/06/19)          | 766                        | 1600                      |
| 2 (03/05/20)          | 8.50E+06                   | 6.74E+06                  |
| 2 (03/25/20)          | 2.10E+06                   | 9.32E+05                  |
| 3 (06/26/20)          | 1.59E+04                   | 2350                      |
| 3 (07/14/20)          | 1.19E+04                   | 1100                      |
| 3 (08/18/20)          | 1031                       | 350                       |
| 3 (09/01/20)          | 281                        | 650                       |
| 3 (11/03/20)          | 594                        | 600                       |
| 3 (02/16/21)          | 422                        | <250                      |
| 3 (05/18/21)          | Und                        | Und                       |
| 3 (10/13/21)          | Und                        | Und                       |
| 4 (09/03/20)          | 391                        | <250                      |
| 5 (09/09/20)          | 7188                       | 4300                      |
| 6 (01/21/21)          | 500                        | <250                      |
| 6 (04/20/21)          | 1109                       | 300                       |
| 7 (03/01/21)          | 1.09E+04                   | 3600                      |
| 7 (03/18/21)          | 1172                       | 350                       |
| 7 (04/12/21)          | 3594                       | 1500                      |
| 7 (04/23/21)          | 4218                       | 600                       |
| 8 (03/19/21)          | 4.30E+05                   | 2.28E+05                  |
| 8 (04/12/21)          | 4.70E+04                   | 3.06E+04                  |
| 9 (01/27/21)          | 344                        | Und                       |
| 9 (03/19/21)          | 391                        | <250                      |
| 9 (03/30/21)          | 1171                       | <250                      |
| 10 (04/30/21)         | 1219                       | 550                       |
| 10 (06/01/21)         | 2156                       | 1350                      |
| 10 (06/28/21)         | 438                        | 600                       |
| 10 (08/05/21)         | 625                        | 1750                      |
| 11 (06/24/21)         | 1234                       | 350                       |
| 11 (07/14/21)         | 3031                       | Und                       |
| 11 (08/05/21)         | 5313                       | 2800                      |
| 11 (09/02/21)         | 4031                       | 4450                      |
| 11 (10/26/21)         | 1625                       | 600                       |
| 12 (11/08/18)         | 356                        | Und                       |
| 13 (06/08/18)         | 178                        | Und                       |
| 14 (02/05/21)         | Und                        | Und                       |
| 15 (06/09/21)         | 4063                       | 700                       |
| 16 (07/13/21)         | 2.00E+06                   | 8.95E+05                  |
| 17 (07/30/19)         | 6.59E+04                   | 1.73E+04                  |
| 18 (01/12/21)         | Und                        | Und                       |
| 19 (08/26/21)         | 828                        | <250                      |
| 20 (07/08/21)         | 7.73E+04                   | 1.55E+04                  |

|               |          |          |
|---------------|----------|----------|
| 20 (08/04/21) | 1.36E+05 | 3.31E+04 |
| 20 (09/23/21) | 1359     | 2560     |
| 20 (12/10/21) | 2188     | 1700     |
| 21 (04/12/21) | 281      | <250     |
| 21 (05/17/21) | Und      | Und      |
| 22 (08/26/21) | 766      | Und      |
| 22 (11/16/21) | Und      | Und      |
| 22 (12/22/21) | Und      | Und      |
| 23 (10/05/21) | 2.28E+04 | 6650     |
| 24 (08/25/21) | 2.41E+04 | 1.38E+04 |
| 25 (10/5/21)  | Und      | Und      |
| 25 (11/12/21) | 266      | <250     |
| 25 (12/03/21) | 1281     | 250      |
| 26 (09/30/21) | 2531     | 1100     |
| 26 (10/19/21) | 1219     | 1050     |
| 27 (09/05/19) | 1687     | <250     |
| 28 (11/06/19) | 1859     | 300      |
| 29 (11/15/19) | 1125     | 450      |
| 30 (10/21/21) | 31250    | 23700    |
| 31 (12/17/21) | 656      | 600      |

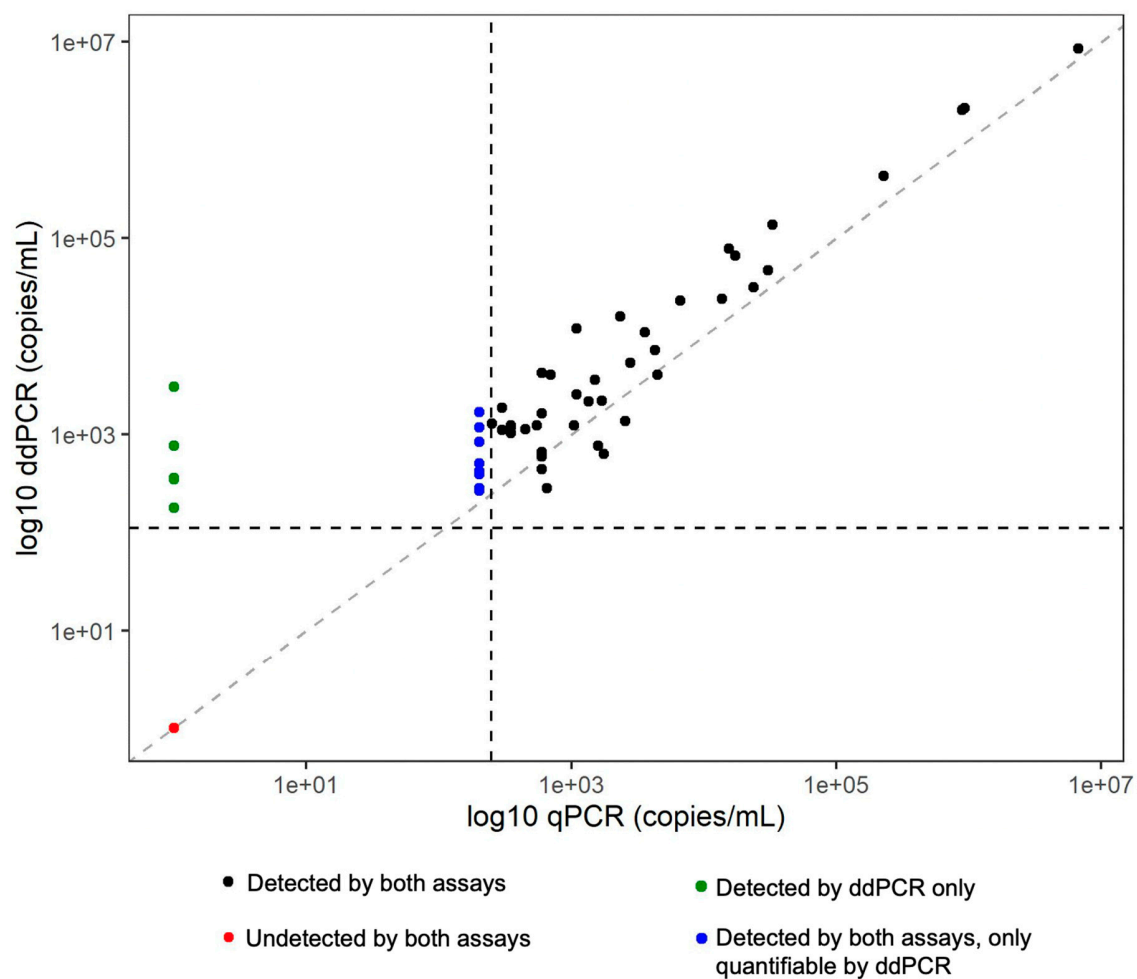

**Supplementary Figure S2.** Agreement plot of log10 qPCR vs log10 ddPCR samples. Observations above the gray dashed identity line indicate samples where higher levels of ddPCR were detected compared to qPCR. The dashed black vertical line indicates the cutoff for detectability and ability to be quantified in qPCR (>250). The dashed black horizontal line indicates the cutoff for detectability in ddPCR (110). There are a total of 8 samples that were undetectable on both methods, shown as one overplotted point in red.

**Supplementary Table S4.** MS-natalizumab treated patients, JCPyV seropositive

| ID   | Natalizumab Duration | JCPyV Ab-Titer |
|------|----------------------|----------------|
| MS 1 | 48 months            | 2.37           |
| MS 2 | Still on; Q6         | 0.44           |
| MS 3 | 48 months            | 1.27           |

MS = Multiple Sclerosis; Q6 = 6-week interval

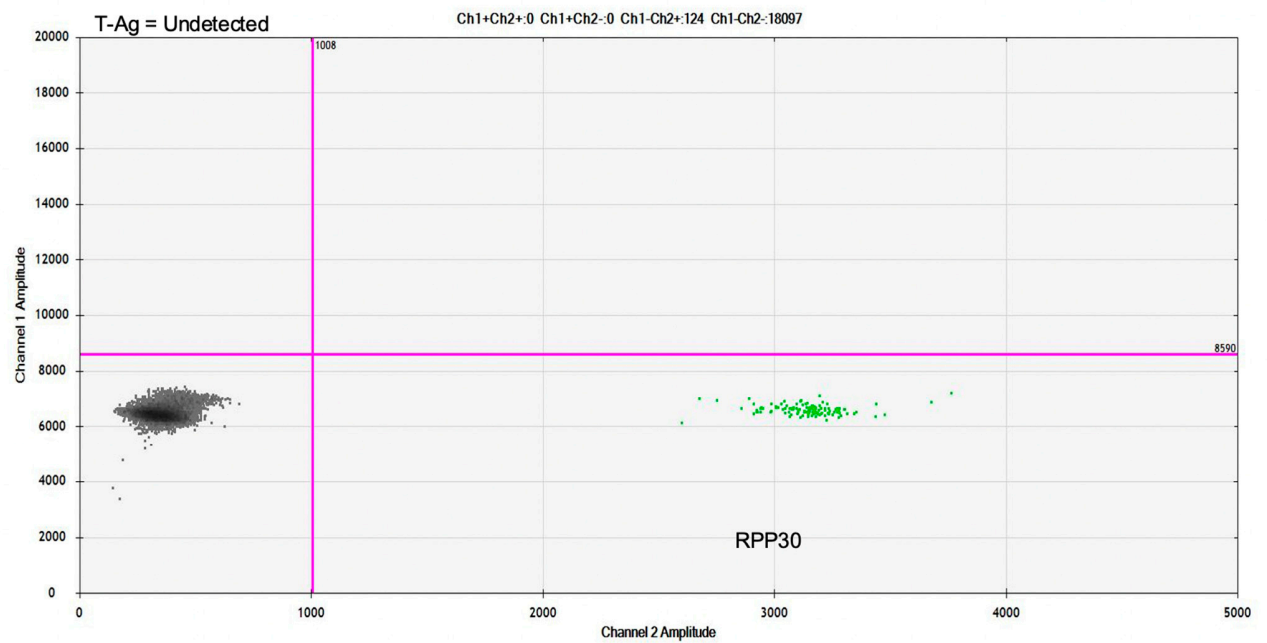

**Supplementary Figure S3.** Representative plots of triplex ddPCR of a serum sample from an MS patient. JCPyV genomes were undetected while only the RPP30 housekeeping gene was amplified
